# Supplementary material for: Effects of tesamorelin on hepatic transcriptomic signatures in HIV-associated NAFLD
Source: JCI journal article supplement (doi:10.1172/jci.insight.140134), 2020-07-23
Supplement: sd1 [file 1]

**Supplementary Table 1: Comparison Between Entire Study Cohort and RNA Sequencing Cohort**

|                                                   | RNA Sequencing Cohort (N=39) |                     | Entire Study Cohort (N=61) |                     |
|---------------------------------------------------|------------------------------|---------------------|----------------------------|---------------------|
|                                                   | Tesamorelin<br>(n = 18)      | Placebo<br>(n = 21) | Tesamorelin<br>(n = 31)    | Placebo<br>(n = 30) |
| Age (years)                                       | 53 ± 7                       | 53 ± 8              | 52 ± 8                     | 54 ± 7              |
| % Male                                            | 72                           | 81                  | 77                         | 80                  |
| % Race                                            |                              |                     |                            |                     |
| White                                             | 56                           | 62                  | 68                         | 63                  |
| Black                                             | 39                           | 33                  | 26                         | 33                  |
| Other                                             | 6                            | 5                   | 7                          | 3                   |
| % Hispanic                                        | 11                           | 5                   | 19                         | 10                  |
| Duration of HIV infection (years)                 | 15 ± 9                       | 18 ± 9              | 16 ± 9                     | 18 ± 8              |
| CD4 count (cells/mm <sup>3</sup> )                | 715 ± 262                    | 795 ± 273           | 733 ± 290                  | 798 ± 260           |
| log HIV viral load                                | 0.29 ± 0.56                  | 0.50 ± 0.75         | 0.34 ± 0.59                | 0.50 ± 0.74         |
| % Current Antiretroviral Use                      |                              |                     |                            |                     |
| NRTI                                              | 83                           | 100                 | 87                         | 97                  |
| PI                                                | 28                           | 24                  | 29                         | 20                  |
| NNRTI                                             | 39                           | 33                  | 39                         | 37                  |
| Integrase Inhibitor                               | 72                           | 57                  | 68                         | 60                  |
| % Type 2 Diabetes                                 | 6                            | 10                  | 13                         | 13                  |
| Hepatic Fat Fraction (%)                          | 13 ± 8                       | 15 ± 10             | 13 ± 8                     | 15 ± 10             |
| % NASH                                            | 28                           | 33                  | 35                         | 31                  |
| % Fibrosis                                        | 44                           | 38                  | 48                         | 38                  |
| Stage 1                                           | 17                           | 14                  | 14                         | 17                  |
| Stage 2                                           | 17                           | 14                  | 21                         | 14                  |
| Stage 3                                           | 11                           | 10                  | 14                         | 7                   |
| Body mass index (kg/m <sup>2</sup> )              | 30.6 ± 7.0                   | 33.0 ± 5.4          | 30.1 ± 6.0                 | 32.9 ± 6.2          |
| Waist circumference (cm)                          | 109 ± 16                     | 114 ± 11            | 107 ± 15                   | 114 ± 12            |
| Visceral adipose tissue area (cm <sup>2</sup> )   | 235 ± 100                    | 256 ± 112           | 232 ± 91                   | 250 ± 104           |
| Daily caloric intake per kg body weight (kcal/kg) | 20 ± 8                       | 24 ± 7              | 23 ± 9                     | 23 ± 7              |

**Supplementary Table 2: Relationships of Changes in Hepatic Gene Expression with Change in Hepatic Fat**

|                                   | <b>P-Value for Overall ANOVA*</b> | <b>P-Value for Linear Trend*</b> | <b>Slope</b> | <b>95% CI of Slope</b> |
|-----------------------------------|-----------------------------------|----------------------------------|--------------|------------------------|
| OXIDATIVE_PHOSPHORYLATION         | 0.04                              | 0.02                             | 0.05414      | 0.01054 to 0.09774     |
| HCC_FAVORABLE_PROGNOSIS           | 0.05                              | 0.03                             | 0.07936      | 0.007485 to 0.1512     |
| TNFA_SIGNALING_VIA_NFKB           | 0.0004                            | 0.0003                           | -0.1083      | -0.1627 to -0.05382    |
| IL6_JAK_STAT3_SIGNALING           | 0.0004                            | <0.0001                          | -0.1176      | -0.1714 to -0.06376    |
| ALLOGRAFT_REJECTION               | 0.02                              | 0.008                            | -0.08164     | -0.1404 to -0.02288    |
| INFLAMMATORY_RESPONSE             | 0.0002                            | <0.0001                          | -0.1084      | -0.1572 to -0.05961    |
| IL2_STAT5_SIGNALING               | <0.0001                           | <0.0001                          | -0.1091      | -0.1487 to -0.06962    |
| TGF_BETA_SIGNALING                | 0.005                             | 0.003                            | -0.09041     | -0.1479 to -0.03290    |
| APOPTOSIS                         | 0.001                             | 0.0003                           | -0.1131      | -0.1698 to -0.05635    |
| UV_RESPONSE_DN                    | <0.0001                           | <0.0001                          | -0.09884     | -0.1420 to -0.05568    |
| EPITHELIAL_MESENCHYMAL_TRANSITION | 0.06                              | 0.03                             | -0.1017      | -0.1898 to 0.01363     |
| KRAS_SIGNALING_UP                 | 0.001                             | 0.0004                           | -0.1041      | -0.1586 to -0.04956    |
| MITOTIC_SPINDLE                   | 0.0004                            | 0.001                            | -0.08051     | -0.1264 to -0.03458    |
| E2F_TARGETS                       | 0.0002                            | 0.0007                           | -0.09821     | -0.1517 to -0.04474    |
| G2M_CHECKPOINT                    | <0.0001                           | 0.0006                           | -0.09628     | -0.1484 to -0.04419    |
| HCC_POOR_PROGNOSIS                | 0.3                               | 0.1                              | -0.07516     | -0.1783 to 0.02797     |
| YAP_TAZ_SIGNATURE                 | 0.003                             | 0.0009                           | -0.1298      | -0.2023 to -0.05733    |

Statistical comparison of changes in expression of gene sets with changes in hepatic fat fraction, across three participant groups: placebo, tesamorelin treated with <30% relative change in hepatic fat fraction, and tesamorelin treated with ≥30% relative change in hepatic fat fraction. The slope represents change from no treatment (placebo) to treatment with lower change in hepatic fat (<30%) to treatment with greater change in hepatic fat (≥30%).

**Supplementary Table 3: Correlations of Changes in Differentially Regulated Gene Sets with Change in *IGF1* Transcript Level and Fibrosis-Related Gene Score Among Tesamorelin-Treated Participants**

|                                   | Change in <i>IGF1</i><br>Transcript Level | Change in<br>Fibrosis-Related<br>Gene Score |
|-----------------------------------|-------------------------------------------|---------------------------------------------|
| OXIDATIVE_PHOSPHORYLATION         | $r = 0.42, P = 0.08$                      | $r = -0.53, P = 0.02$                       |
| HCC_FAVORABLE_PROGNOSIS           | $r = 0.62, P = 0.006$                     | $r = -0.79, P < 0.0001$                     |
| TNFA_SIGNALING_VIA_NFKB           | $r = -0.39, P = 0.11$                     | $r = 0.50, P = 0.03$                        |
| IL6_JAK_STAT3_SIGNALING           | $r = -0.27, P = 0.28$                     | $r = 0.27, P = 0.28$                        |
| ALLOGRAFT_REJECTION               | $r = -0.34, P = 0.16$                     | $r = 0.64, P = 0.005$                       |
| INFLAMMATORY_RESPONSE             | $r = -0.31, P = 0.21$                     | $r = 0.46, P = 0.06$                        |
| IL2_STAT5_SIGNALING               | $r = -0.34, P = 0.16$                     | $r = 0.62, P = 0.006$                       |
| TGF_BETA_SIGNALING                | $r = -0.49, P = 0.04$                     | $r = 0.64, P = 0.004$                       |
| APOPTOSIS                         | $r = -0.38, P = 0.12$                     | $r = 0.74, P = 0.0005$                      |
| UV_RESPONSE_DN                    | $r = -0.53, P = 0.02$                     | $r = 0.60, P = 0.009$                       |
| EPITHELIAL_MESENCHYMAL_TRANSITION | $r = -0.33, P = 0.18$                     | $r = 0.82, P < 0.0001$                      |
| KRAS_SIGNALING_UP                 | $r = -0.35, P = 0.16$                     | $r = 0.77, P = 0.0002$                      |
| MITOTIC_SPINDLE                   | $r = -0.54, P = 0.02$                     | $r = 0.74, P = 0.0004$                      |
| E2F_TARGETS                       | $r = -0.01, P = 0.97$                     | $r = 0.54, P = 0.02$                        |
| G2M_CHECKPOINT                    | $r = -0.06, P = 0.83$                     | $r = 0.52, P = 0.03$                        |
| HCC_POOR_PROGNOSIS                | $r = -0.41, P = 0.09$                     | $r = 0.84, P < 0.0001$                      |
| YAP_TAZ_SIGNATURE                 | $r = -0.57, P = 0.01$                     | $r = 0.52, P = 0.03$                        |

Supplementary Figure 1

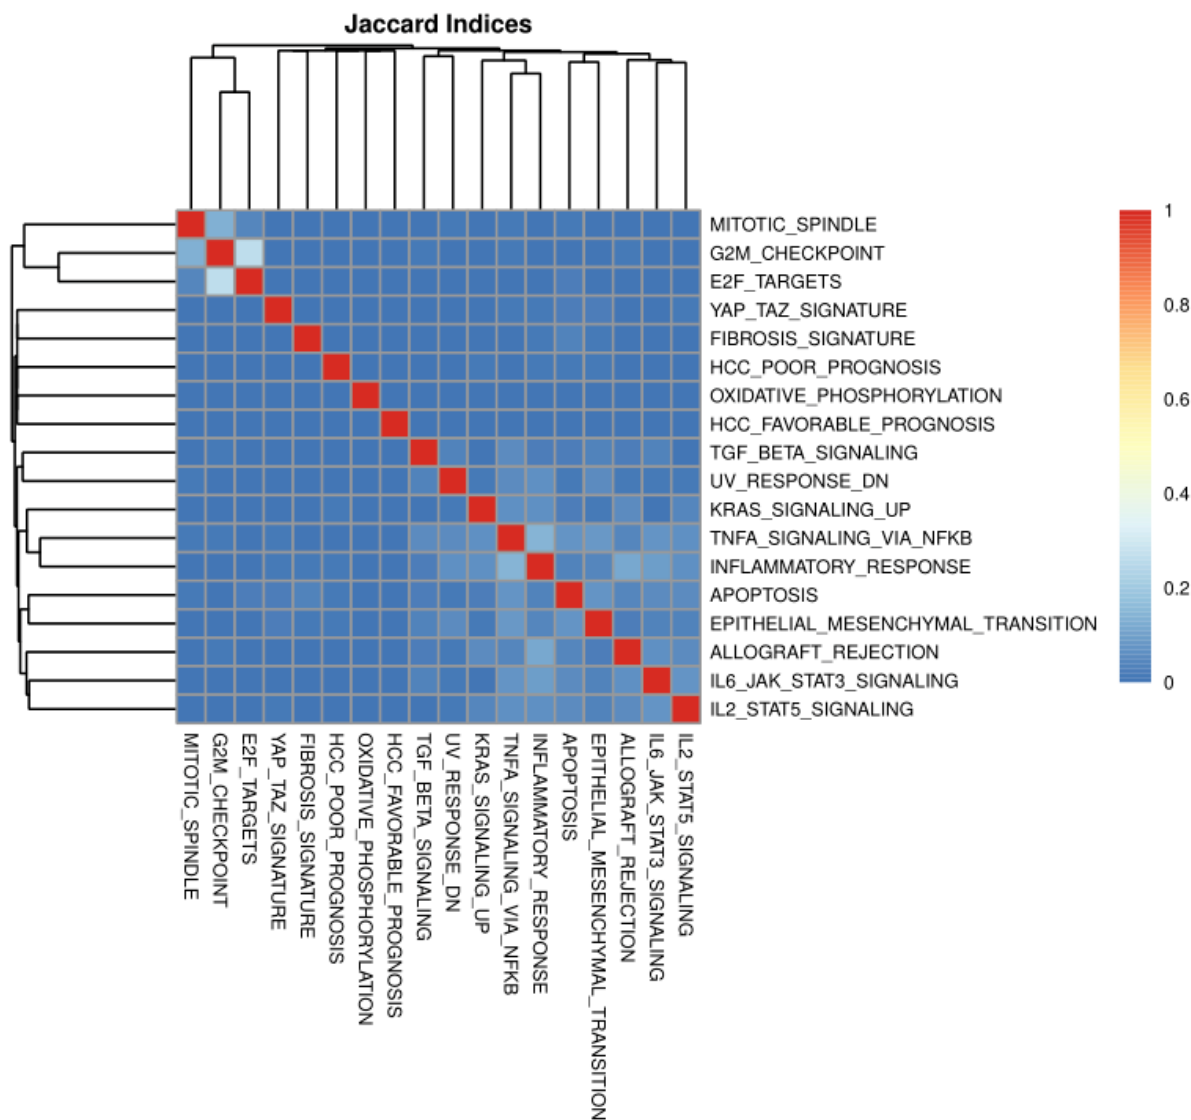

**Jaccard Plot for Differentially Regulated Gene Sets.** A Jaccard plot depicts correlations between gene sets that were differentially modulated by treatment status. Notably, there was minimal overlap between gene sets, which reinforces the independence of our findings.

**Supplementary Figure 2**

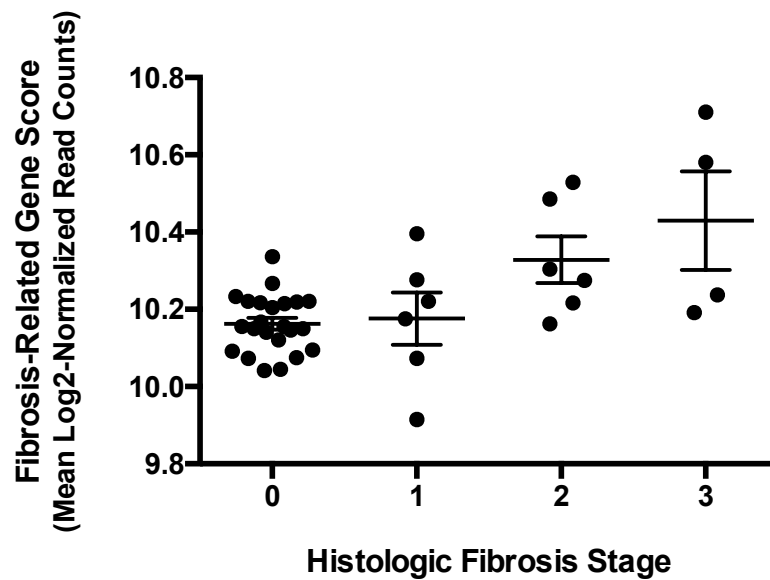

**Fibrosis-Related Gene Score Was Associated with Histologic Fibrosis Stage.** In our overall sample at baseline, we found a strong correlation between histologic fibrosis stage and fibrosis-related gene score, which was derived from a previously published gene set (Hoang et al., *Sci Rep*, 2019; 9(1):12541). P-value for ANOVA  $P = 0.0009$ ; post-ANOVA test for trend P-value 0.0001. This finding validated the use of fibrosis-related gene score in our analysis as a proxy for liver histology.

### Supplementary Figure 3

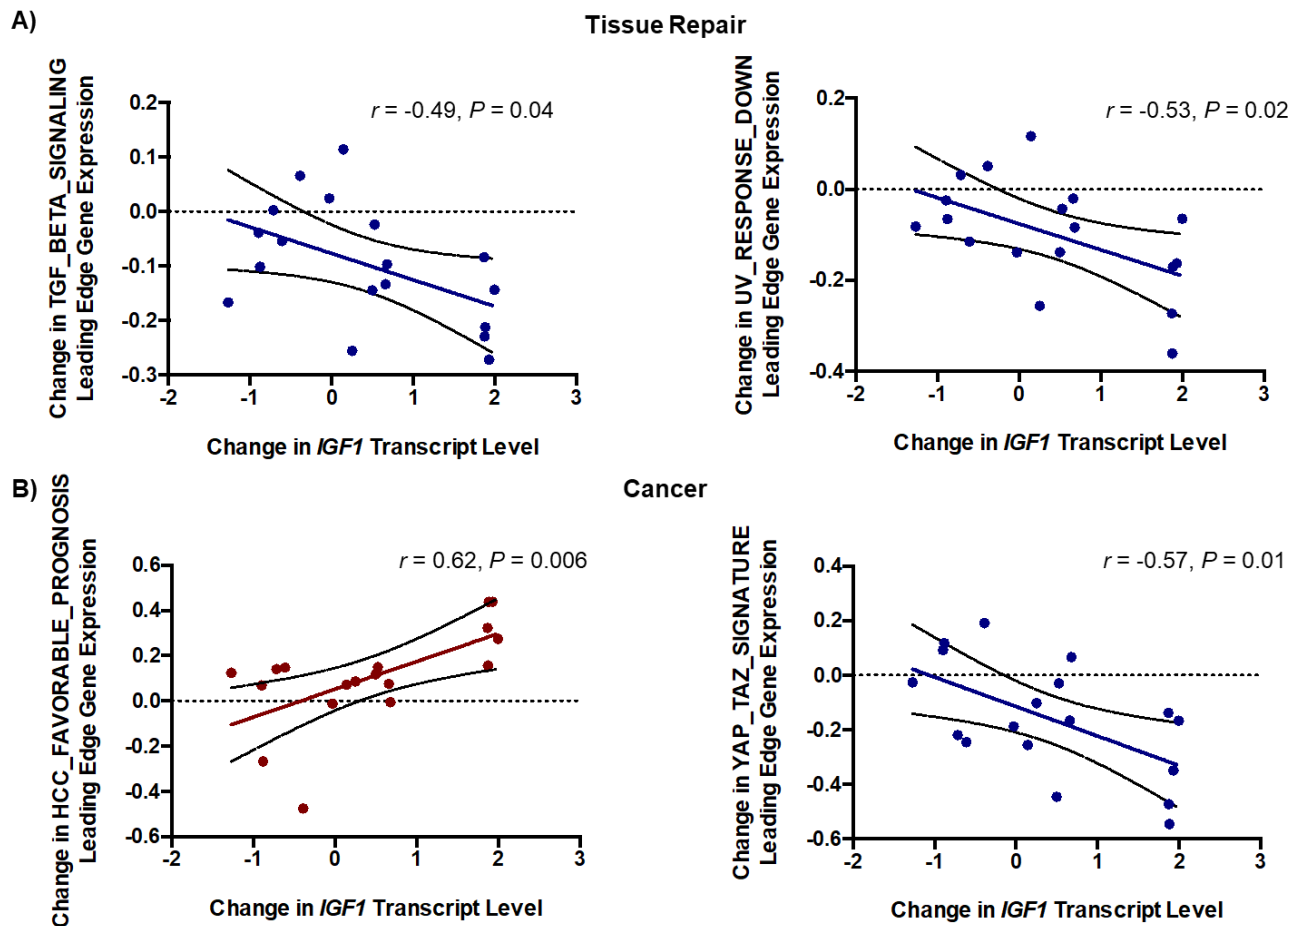

### Change in *IGF1* Transcript Level Was Associated with Changes in Hepatic Expression of Tissue Repair and Cancer-Related Gene Sets in Tesamorelin-Treated Participants. **A)**

Within the tesamorelin group, a greater augmentation in hepatic *IGF1* transcript level was associated with a more marked decline in tissue repair gene pathways. **B)** Likewise, a greater rise in hepatic *IGF1* transcript level was correlated with more favorable changes in the expression of hepatocellular carcinoma gene sets. For all graphs, axes reflect log<sub>2</sub>-fold change in gene expression. Linear regression lines with 95% confidence intervals are shown. Graphs with red and blue dots correspond to pathways up- and downregulated by tesamorelin versus placebo, respectively.
